# Supplementary material
Source: Springer Nature journal article supplement (https://www.springermedizin.de/resource/supplementary/12887_2006_156_MOESM1_ESM.pdf/9477386)

Epoch 1  
July 1, 1990 - June 30, 1995

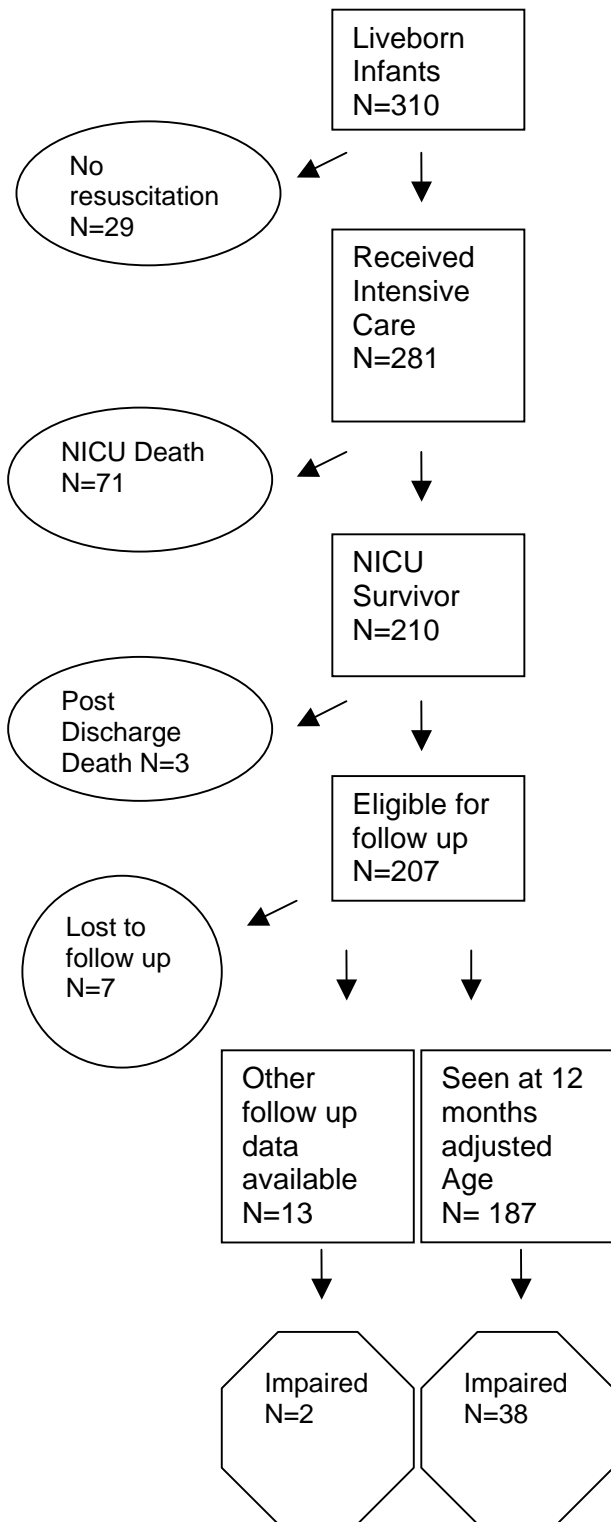

Epoch 2  
July 1, 1995 - June 30, 2000

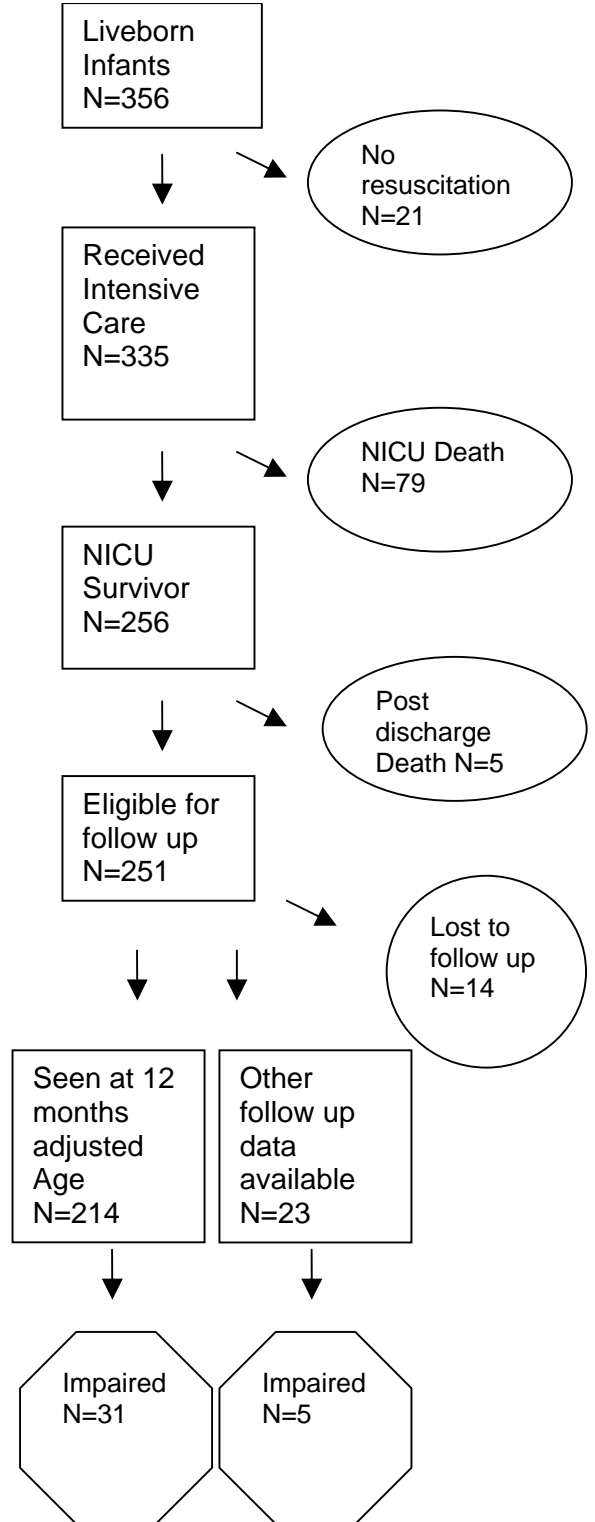

Supplement: MOESM1 [file 9477386]
